# Supplementary material for: Gestational and Lactational Exposure to an Environmentally Relevant Mixture of Brominated Flame Retardants Downregulates Junctional Proteins, Thyroid Hormone Receptor α1 Expression, and the Proliferation-Apoptosis Balance in Mammary Glands Post Puberty
Source: Oxford University Press journal article supplement (doi:10.1093/toxsci/kfz147), 2019-06-25
Supplement: kfz147_supplementary_data.zip [file kfz147_supplementary_data.zip]

Archive with 3 entries (3 files):
- toxsci-19-0221-File011.pdf
- toxsci-19-0221-File012.tif
- toxsci-19-0221-File013.tif
