# Supplementary material for: Gestational and Lactational Exposure to an Environmentally Relevant Mixture of Brominated Flame Retardants Downregulates Junctional Proteins, Thyroid Hormone Receptor α1 Expression, and the Proliferation-Apoptosis Balance in Mammary Glands Post Puberty
Source: Oxford University Press journal article supplement (doi:10.1093/toxsci/kfz147), 2019-06-25
Supplement: kfz147_supplementary_data.zip [file kfz147_supplementary_data.zip › toxsci-19-0221-File011.pdf]

### **Supplementary Data Description**

Supplementary data present different markers that were not affected by the BFR mixture treatments. These data include mammary gland/body weight ratios and the levels of markers of the epithelial-mesenchymal transition in offspring. Tables of the different antibodies used in this study are also included.

#### **Supplementary Figure 1: Effects of exposure to a BFR mixture on epithelial to mesenchymal transition makers in the mammary glands of PND 46 offspring.**

Quantitative western blot of total proteins extracted from the mammary glands of control pups or pups exposed during gestation and lactation to a dietary BFR mixture formulated to deliver daily nominal BFR mixture doses of 0.06, 20 or 60 mg/kg of body weight/day (mg/kg/day). Graphs show N-cadherin (**A**) and Vimentin (**B**) protein expression at PND 46. Histograms represent the means  $\pm$  SEM (n=9-14 pups, one per litter) for each band normalized to the total protein level.

#### **Supplementary Figure 2: Effects of exposure to a BFR mixture on epithelial surface area and elongation of the mammary gland in PND 46 offspring.**

Whole mounts of mammary glands were analyzed with Image J software. Mammary epithelium elongation or surface area were quantified at PND 46 (**A**; **C**) from control pups or pups exposed during gestation and lactation to a dietary BFR mixture intended to deliver nominal BFRs mixture dose of 0.06, 20, or 60 mg/kg of body weight/day (mg/kg/day). Elongation was measured from the lowest lymph node to the end of the longest branch of the epithelium (**A**). Surface area was measured by tracing the best-adjusted contour of the mammary epithelium at PND 46 (**C**). Terminal end buds were counted in PND 46 mammary glands using Image J software (**C**). Total body or mammary gland weight were measured at time of sacrifice of PND 46 (**D**; **E**). The mammary gland weight of PND 46 (**F**) were normalized to the total body weight. Histograms represent the mean  $\pm$  SEM (n=9-14 pups, one per litter). p-values were calculated with a Kruskal-wallis or an ANOVA statistical tests.

**Supplementary table 1: Antibodies used for western blot analysis**

| Target protein                      | Description/Host | Dilution | Catalogue number | Manufacturer             |
|-------------------------------------|------------------|----------|------------------|--------------------------|
| E-cadherin                          | (4A2) Mouse      | 1/1000   | 14472            | Cell signaling           |
| $\beta$ -catenin                    | (L54E2) Mouse    | 1/1000   | 8480             | Cell signaling           |
| Phospho- $\beta$ -Catenin (Ser675)  | (D2F1) Rabbit    | 1/1000   | 4176             | Cell signaling           |
| Cx43                                | Rabbit           | 1/500    | C6219            | Sigma Aldrich            |
| Cx26                                | Mouse            | 1/750    | 33-5800          | Invitrogen               |
| ER $\alpha$                         | Rabbit           | 1/400    | Ab75635          | Abcam                    |
| ER $\beta$                          | Rabbit           | 1/500    | SC-8974          | Santa Cruz biotechnology |
| PR A/B                              | Rabbit           | 1/500    | Ab16661          | Abcam                    |
| Thyroid Hormone Receptor $\alpha$ 1 | Rabbit           | 1/500    | Ab53729          | Abcam                    |
| Thyroid Hormone Receptor $\beta$    | Rabbit           | 1/500    | Ab196484         | Abcam                    |
| N-cadherin                          | Rabbit           | 1/1000   | 4061             | Cell signaling           |
| Vimentin                            | Rabbit           | 1/1000   | 5741             | Cell signaling           |
| CREB                                | (C21) Rabbit     | 1/500    | Sc-186           | Santa Cruz biotechnology |
| Phospho-CREB(Ser133)                | (87G3) Rabbit    | 1/1000   | 9198             | Cell signaling           |
| PARP                                | Rabbit           | 1/1000   | 9532             | Cell signaling           |
| Cleaved Caspase-3                   | Rabbit           | 1/1000   | 9661             | Cell signaling           |

|                                           |       |         |       |                |
|-------------------------------------------|-------|---------|-------|----------------|
| PCNA                                      | Mouse | 1/2000  | 2586S | Cell signaling |
| <b>Secondary antibodies</b>               |       |         |       |                |
| Anti-rabbit IgG<br>HRP-linked<br>antibody |       | 1/10000 | 7074s | Cell signaling |
| anti-mouse IgG<br>HRP-linked<br>antibody  |       | 1/10000 | 7076s | Cell signaling |

**Supplementary table 2: Antibodies used for immunofluorescence blot analysis**

| <b>Target protein</b>                         | <b>Description/Host</b> | <b>Dilution</b> | <b>Catalogue number</b> | <b>Manufacturer</b> |
|-----------------------------------------------|-------------------------|-----------------|-------------------------|---------------------|
| E-cadherin                                    | (4A2) Mouse             | 1/1000          | 14472                   | Cell signaling      |
| $\beta$ -catenin                              | (L54E2) Mouse           | 1/1000          | 8480                    | Cell signaling      |
| Phospho- $\beta$ -Catenin<br>(Ser675)         | (D2F1) Rabbit           | 1/1000          | 4176                    | Cell signaling      |
| Cx43                                          | Rabbit                  | 1/500           | C6219                   | Sigma Aldrich       |
| <b>Secondary antibodies</b>                   |                         |                 |                         |                     |
| anti-rabbit<br>IgG Fab2<br>Alexa Fluor<br>488 |                         | 1/1000          | 4412s                   | Cell signaling      |
| anti-mouse<br>IgG Fab2<br>Alexa Fluor<br>555  |                         | 1/1000          | 4409s                   | Cell signaling      |
